# Supplementary material for: Synthesis of silver nanoparticles coupled with aromatic diselenides: greener approach, potential against glioma cells and DNA interaction
Source: Royal Society of Chemistry journal article supplement (doi:10.1039/d2nj04810h), 2022-12-26
Supplement: d2nj04810h1.pdf [file d2nj04810h1.pdf]

## Synthesis of silver nanoparticles coupled with aromatic diselenides: greener approach, potential against glioma cells and DNA interaction

Sumbal Saba,<sup>a\*</sup> Natalia B. Preve,<sup>b</sup> Isis J. A. Granja,<sup>a</sup> Gabriela J. Pedroso,<sup>b</sup> Climei R. Cabreira,<sup>c</sup> Juliana P. Dreyer,<sup>d</sup> Luiz F. B. Ribeiro,<sup>b</sup> Ana P. Horn,<sup>e</sup> Marcelo A. G. Marinho,<sup>e</sup> Ismael C. Bellettini,<sup>f</sup> Claus T. Pich,<sup>b</sup> Lucas T. F. Kokuszi,<sup>g</sup> Eduardo Borges,<sup>g</sup> Vânia R. de Lima,<sup>g</sup> Jamal Rafique,<sup>a,c\*</sup> Tiago E. A. Frizon<sup>b\*</sup>

<sup>a</sup>. Instituto de Química, Universidade Federal de Goiás, Goiânia, 74690-900, GO-Brazil. E-mail: [sumbalsaba@ufg.br](mailto:sumbalsaba@ufg.br)

<sup>b</sup>. Department of Energy and Sustainability, Federal University of Santa Catarina, Araranguá, SC, Brazil. E-mail: [tiago.frizon@ufsc.br](mailto:tiago.frizon@ufsc.br)

<sup>c</sup>. Institute of Chemistry, Federal University of Mato Grosso do Sul, Campo Grande, 79074-460, MS-Brazil. <https://sintmol.ufms.br/> E-mail: [jamal.rafique@ufms.br](mailto:jamal.rafique@ufms.br), [jamal.chm@gmail.com](mailto:jamal.chm@gmail.com)

<sup>d</sup>. Department of Chemistry, Federal University of Santa Catarina, 88040-970, Florianópolis, SC-Brazil.

<sup>e</sup>. Institute of Biological Sciences, Post-Graduate Program in Physiological Sciences, Federal University of Rio Grande, Rio Grande, RS, Brazil.

<sup>f</sup>. Department of Exact Sciences and Education, Federal University of Santa Catarina, Blumenau, SC, Brazil

<sup>g</sup>. Escola de Química e Alimentos, Programa de Pós-Graduação em Química Tecnológica e Ambiental, Universidade Federal do Rio Grande, RS, Brazil.

### TABLE OF CONTENTS

|                         |       |   |
|-------------------------|-------|---|
| 1. NMR characterization | ..... | 2 |
| 2. Cell viability       | ..... | 5 |

## NMR Spectra

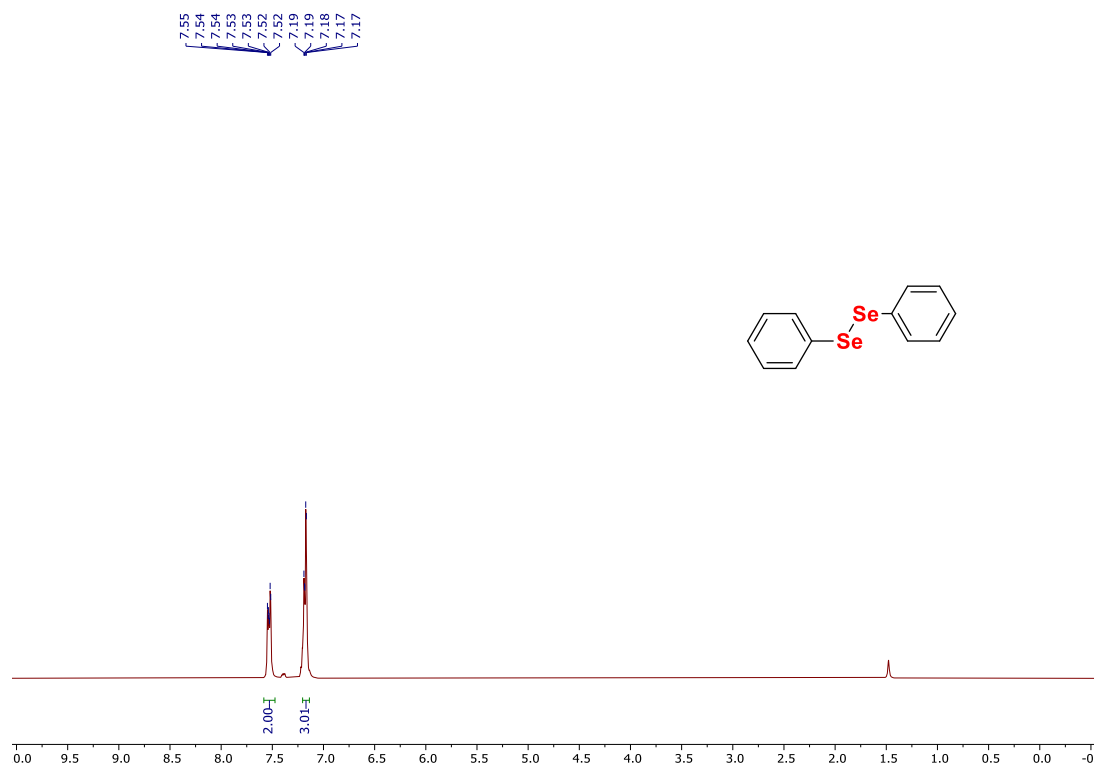

ESI Figure 1: <sup>1</sup>H NMR (300 MHz, CDCl<sub>3</sub>) spectrum of diphenyl diselenide

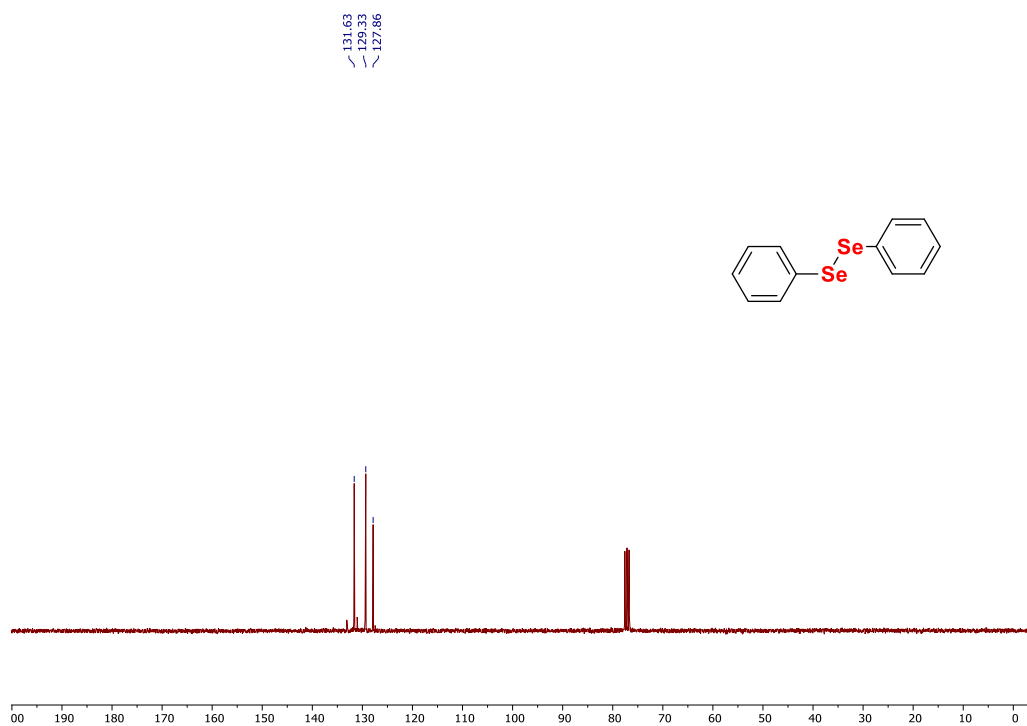

ESI Figure 2: <sup>13</sup>C NMR (75 MHz, CDCl<sub>3</sub>) spectrum of diphenyl diselenide

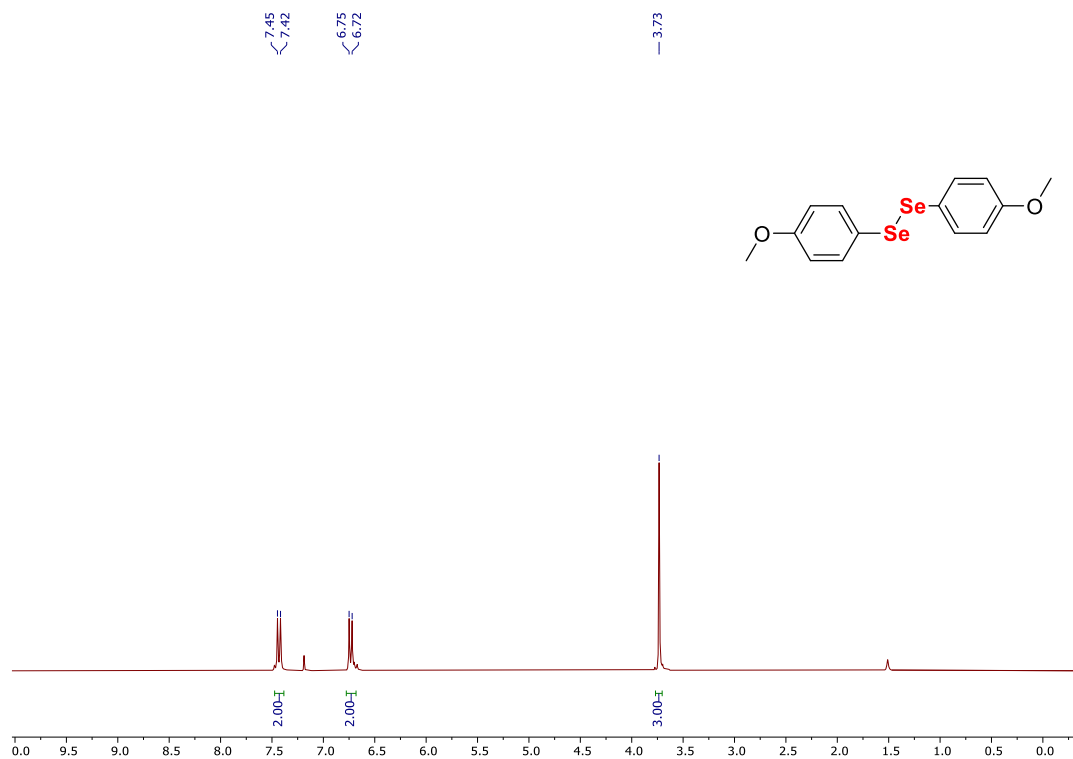

ESI Figure 3:  $^1\text{H}$  NMR (300 MHz,  $\text{CDCl}_3$ ) spectrum of *p*-chloro diphenyl diselenide

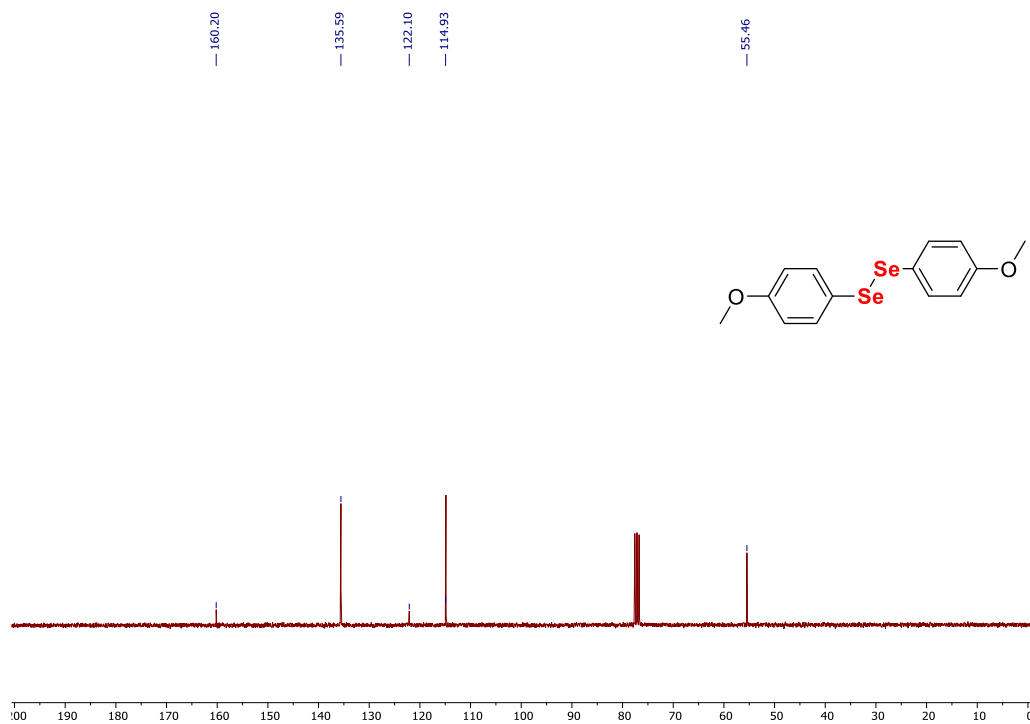

ESI Figure 4:  $^{13}\text{C}$  NMR (75 MHz,  $\text{CDCl}_3$ ) spectrum of *p*-chloro diphenyl diselenide

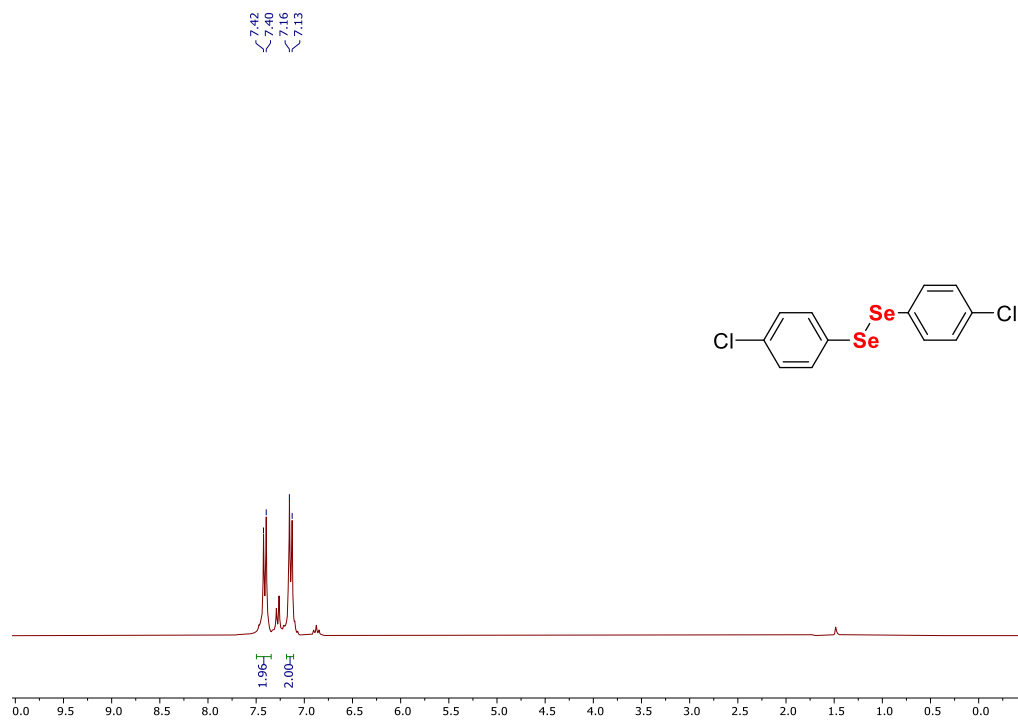

ESI Figure 5: <sup>1</sup>H NMR (300 MHz, CDCl<sub>3</sub>) spectrum of *p*-chloro diphenyl diselenide

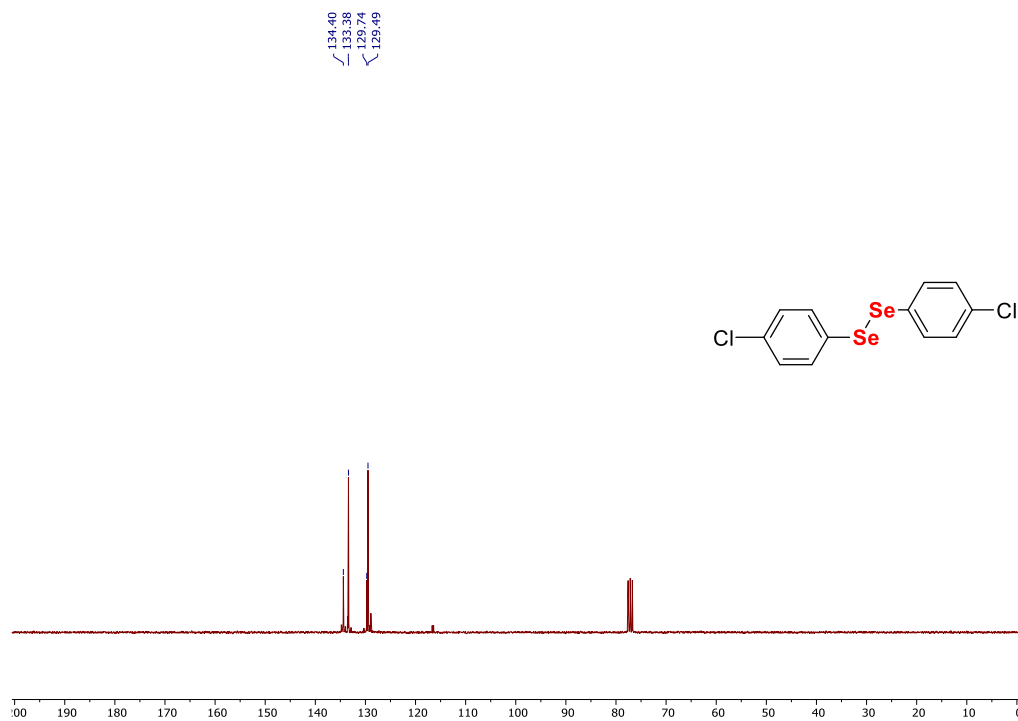

ESI Figure 6: <sup>13</sup>C NMR (75 MHz, CDCl<sub>3</sub>) spectrum of *p*-chloro diphenyl diselenide

**ESI-Table 1:** Cell viability assay by MTT in the C6 cell line. Data are expressed as mean±S.E.M. and the percentage of cell viability reduction compared to the control of each treatment

| <b>(C<sub>6</sub>H<sub>5</sub>Se)<sub>2</sub></b> | <b>Cell viability (mean±S.E.M.)</b> | <b>Cell viability reduction</b> | <b>A3</b>                     | <b>Cell viability % (mean±S.E.M.)</b> | <b>Cell viability reduction</b> |
|---------------------------------------------------|-------------------------------------|---------------------------------|-------------------------------|---------------------------------------|---------------------------------|
| <b>1 μmol L<sup>-1</sup></b>                      | 90.65±7.97                          | 9.35%                           | <b>1 μmol L<sup>-1</sup></b>  | 76.98±10.12                           | 23.02%                          |
| <b>5 μmol L<sup>-1</sup></b>                      | 99.60±2.97                          | 0.4%                            | <b>5 μmol L<sup>-1</sup></b>  | 61.03±6.72                            | 38.97%                          |
| <b>10 μmol L<sup>-1</sup></b>                     | 81.79±3.02                          | 18.21%                          | <b>10 μmol L<sup>-1</sup></b> | 62.75±1.95                            | 37.25%                          |
| <b>25 μmol L<sup>-1</sup></b>                     | 95.93±1.68                          | 4.07%                           | <b>25 μmol L<sup>-1</sup></b> | 44.23±3.79                            | 55.77%                          |
| <b>50 μmol L<sup>-1</sup></b>                     | 72.52±4.87                          | 27.48%                          | <b>50 μmol L<sup>-1</sup></b> | 16.23±1.81                            | 83.77%                          |

  

| <b><i>p</i>-Cl(C<sub>6</sub>H<sub>4</sub>Se)<sub>2</sub></b> | <b>Cell viability (mean±S.E.M.)</b> | <b>Cell viability reduction</b> | <b>A6</b>                     | <b>Cell viability % (mean±S.E.M.)</b> | <b>Cell viability reduction</b> |
|--------------------------------------------------------------|-------------------------------------|---------------------------------|-------------------------------|---------------------------------------|---------------------------------|
| <b>1 μmol L<sup>-1</sup></b>                                 | 96.14±4.26                          | 3.86%                           | <b>1 μmol L<sup>-1</sup></b>  | 108.1±4.98                            | -                               |
| <b>5 μmol L<sup>-1</sup></b>                                 | 82.88±5.03                          | 17.12%                          | <b>5 μmol L<sup>-1</sup></b>  | 67.19±4.25                            | 32.81%                          |
| <b>10 μmol L<sup>-1</sup></b>                                | 91.98±6.31                          | 8.02%                           | <b>10 μmol L<sup>-1</sup></b> | 62.22±6.28                            | 37.78%                          |
| <b>25 μmol L<sup>-1</sup></b>                                | 50.06±5.90                          | 49.94%                          | <b>25 μmol L<sup>-1</sup></b> | 25.07±5.67                            | 74.93%                          |
| <b>50 μmol L<sup>-1</sup></b>                                | 40.37±1.22                          | 59.63%                          | <b>50 μmol L<sup>-1</sup></b> | 12.48±0.36                            | 87.52%                          |

  

| <b><i>p</i>-MeO(C<sub>6</sub>H<sub>4</sub>Se)<sub>2</sub></b> | <b>Cell viability (mean±S.E.M.)</b> | <b>Cell viability reduction (%)</b> | <b>A7</b>                     | <b>Cell viability % (mean±S.E.M.)</b> | <b>Cell viability reduction (%)</b> |
|---------------------------------------------------------------|-------------------------------------|-------------------------------------|-------------------------------|---------------------------------------|-------------------------------------|
| <b>1 μmol L<sup>-1</sup></b>                                  | 92.61±8.69                          | 7.39%                               | <b>1 μmol L<sup>-1</sup></b>  | 70.22±14.28                           | 29.78%                              |
| <b>5 μmol L<sup>-1</sup></b>                                  | 85.90±6.40                          | 14.1%                               | <b>5 μmol L<sup>-1</sup></b>  | 60.41±13.19                           | 39.59%                              |
| <b>10 μmol L<sup>-1</sup></b>                                 | 86.83±2.96                          | 13.17%                              | <b>10 μmol L<sup>-1</sup></b> | 60.19±6.31                            | 39.81%                              |
| <b>25 μmol L<sup>-1</sup></b>                                 | 89.27±1.96                          | 10.73%                              | <b>25 μmol L<sup>-1</sup></b> | 39.85±7.26                            | 60.15%                              |
| <b>50 μmol L<sup>-1</sup></b>                                 | 80.51±6.44                          | 19.49%                              | <b>50 μmol L<sup>-1</sup></b> | 12.51±0.13                            | 87.49%                              |
